# Supplementary material for: Family caregivers’ experiences during the COVID-19 pandemic. A qualitative study.
Source: Research Square preprint supplement (doi:10.21203/rs.3.rs-2531437/v1), 2023-02-02
Supplement: Supplementary file 1 [file 14170acb793f3aa445768535.docx]

**ADDITIONAL FILE 3. SUMMARY OF PRELIMINARY CODES**

| **CAREGIVERS DURING LOCKDOWN – PROVIDING CARE IN A TIME OF ADVERSITY** | |
| --- | --- |
| **Re-structuring family caregiving** | - Taking stock - Taking care of everything - Perpetual connection, constant presence - Reducing the workload - Circumspect caregiving - Looking after a relative |
| **Assuming and incorporating new care** | - COVID-19 preventative care - Overload - Bunkering down at home |
| **Managing health problems** | - Keeping busy - Opening the door to health workers - New caregiving |
| **Staying healthy and looking after oneself** | - Identifying oneself as vulnerable - Caring to keep caring - Coping with fear - Modified self-care - Using computer resources |
| **Confronting adversity** | - Calming information - Information overload - Lack of knowledge - Shutting off of escape routes - Contact bubble - The end of family assistance - Physical repercussions on the caregiver - Social help - Spirituality - Emotional repercussions – fear |
| **CAREGIVING TOWARD NORMALITY** | |
| **Recovering confidence** | - Safety - Screening based on perceived risk |
| **The return of assistance** | - Help returns |
| **Reconnecting with others** | - Recovering one’s leisure time   Resuming social relationships |
