# Supplementary material for: Family caregivers’ experiences during the COVID-19 pandemic. A qualitative study.
Source: Research Square preprint supplement (doi:10.21203/rs.3.rs-2531437/v1), 2023-02-02
Supplement: Supplementary file 2 [file 357a5b2a34891a4b499102f9.docx]

**ADDITIONAL FILE 2. COVID-19 CAREGIVER INTERVIEW GUIDE**

BEFORE YOU START

Ensure that the caregiver is comfortable and that there is not too much ambient noise that will affect recording before you begin.

Explain the following:

- The interview is going to be recorded.
- Agree on the duration. Tell the caregiver that in principle the interview will last a little over an hour although be flexible on this if they have other things to do. The average expected duration will be between 45 minutes and 1 hour, although you should bear in mind it might take longer. Try to keep to the agreed time and if it goes on beyond that, agree on a new time during the interview.

Provide a framework for the interview. Highlight the following aspects:

- *The interview will be all about your opinion and experience. There are no right or wrong answers. We want to know how* ***you******lived through the pandemic****, with a focus on the* ***impact*** *that it has had on the* ***care*** *that you provide.*
- *As in this case what interests us most is the impact, we’ll be asking you again and again during the interview to describe for us how things were BEFORE the pandemic, how it was during LOCKDOWN and whether or not there were any CHANGES. This is going to be the focus of the interview.*

Ask if they have any questions before you start.

Switch on the recorder.

GETTING STARTED

Seek consent to record the interview. The participant has already given their informed consent to take part in the research. This should be done in something like the following way:

- *I’d like to remind you that your participation in this interview is entirely voluntary and that the information that you give us will be anonymised and only used for the purposes of research and teaching. I should inform you that the interview will be recorded in order to make later analysis easier. Do you give your consent to the recording?*

The participant has to answer clearly: “Yes, I give my consent.”

BREAKING THE ICE

The participants have been pre-selected by their nurse because they are caregivers. You can therefore get more directly to the point if you wish to do so. In order to enter into the dynamic of the interview, try some of the following questions:

- *What do you do?*
- *Who do you take care of? What is your relationship with the person you are looking after? How long have you been looking after them?*

INTERVIEW

The idea is to develop a conversation based on very general, open questions which are then closed to help the interview progress by looking for greater detail. It is very important for each aspect that all questions are situated within the following timeframe: BEFORE the pandemic/DURING lockdown/AFTER lockdown. In other studies, the “after lockdown” aspect was framed as “NOW”. You might want to explore this in your interview (“Has there been change from lockdown until now in X?”) to see if things have remained the same.

The issues are aspects that need to be raised during the interview. The following are some of the questions for each issue, although they don’t need to be read out word-for-word or in the same order. Issues should be introduced as the interview evolves following the logic of a conversation (e.g. “You mentioned that your brother helped with the caregiving. How was it before the pandemic?”

ISSUES

Impact of the pandemic

- What was your family’s experience of the pandemic? How was lockdown for you?
- What was the risk of infection like for you? How did it affect you?

Impact on caregiving

- *What kind of care do you provide?*

Think about the various aspects of care such as hygiene, diet, sanitary matters, company, etc.

- *What difficulties have you had? How did you overcome them?*
- *There are often uncertainties about caregiving which might be of a sanitary nature or otherwise. How did you overcome them?*
- *Have you had doubts about medication for example?*

The impact of support

- *How do you organise family care?*
- *Do you have any help? From other family members? From professionals? From social services/social and health resources?*
- *The pandemic had an important impact on the health system, health care centers and hospitals, as well as on other complementary services such as day care centers and nursing homes. How did this affect you? Did you notice important changes that affected your attention, that of your relative, your caregiving?*

Impact on self-care:

- *What have you done to look after yourself and keep yourself fit?*
- *Have you had time for yourself? Leisure/rest/relaxation moments?*
- *Has the pandemic and caregiving had any impact on your physical activity? On your eating habits? On your social relationships?*

General impact assessment

- *What aspects would you point to as those that have most affected your life? Have there been any difficulties/negative moments/major obstacles? Has anything had a positive impact? Have you learnt anything?*

CLOSING THE INTERVIEW

- *Is there anything you would like to add that I haven’t asked you and which you think is important?*

Thank you very much for taking part.
